# Supplementary material for: Adverse effects of paternal chemotherapy exposure on the progeny brain: intergenerational chemobrain
Source: PubMed Central journal article supplement (PMC5839372; doi:10.18632/oncotarget.24311), 2018-01-23
Supplement: oncotarget-09-10069-s001.pdf [file oncotarget-09-10069-s001.pdf]

# Adverse effects of paternal chemotherapy exposure on the progeny brain: intergenerational chemobrain

## SUPPLEMENTARY MATERIALS

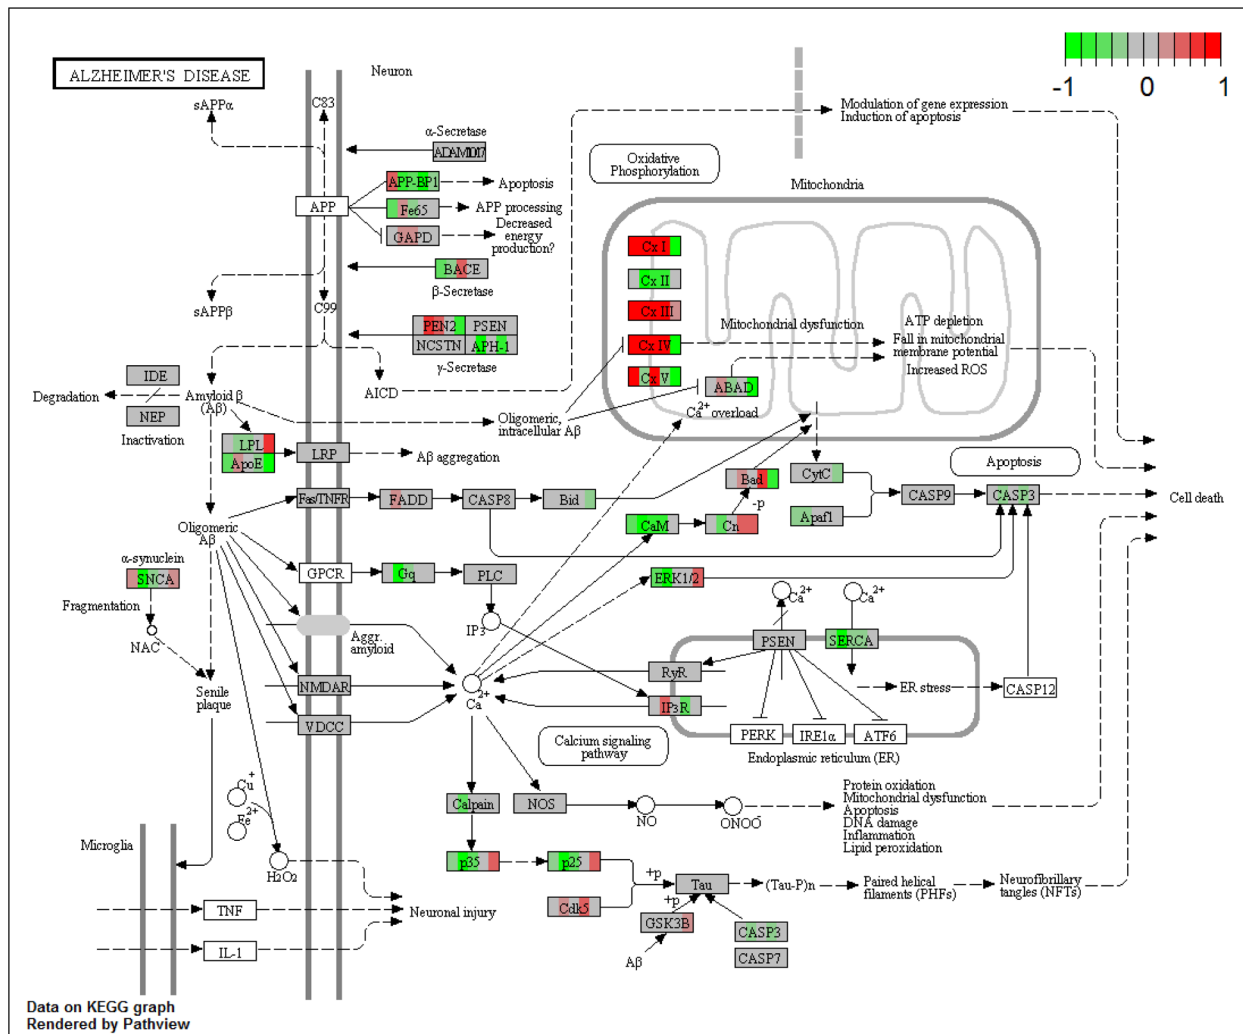

Supplementary Figure 1: KEGG/Pathway analysis – Alzheimer’s disease pathway.



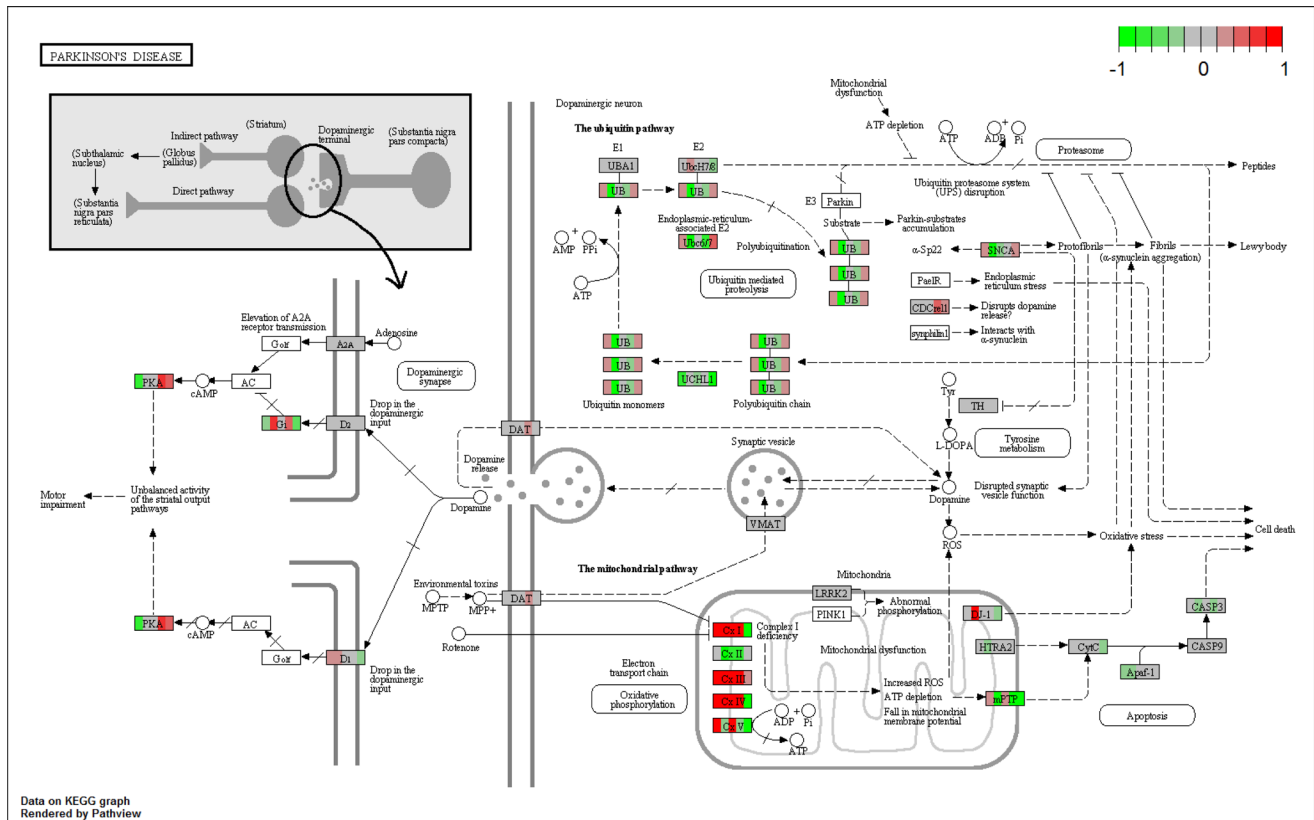

Supplementary Figure 3: KEGG/Pathway analysis – Parkinson’s disease pathway.

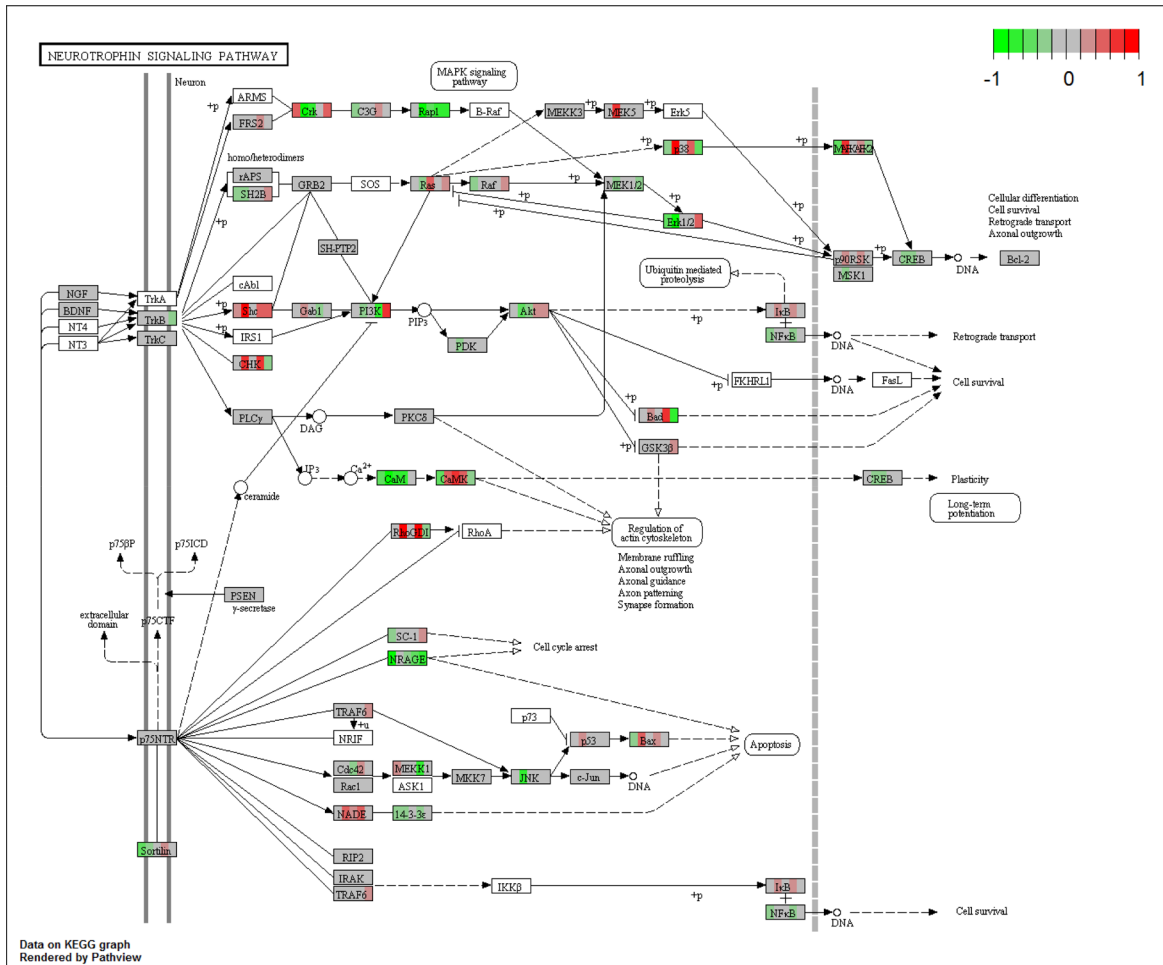

Supplementary Figure 4: KEGG/Pathway analysis – Neurotrophin signalling pathway.



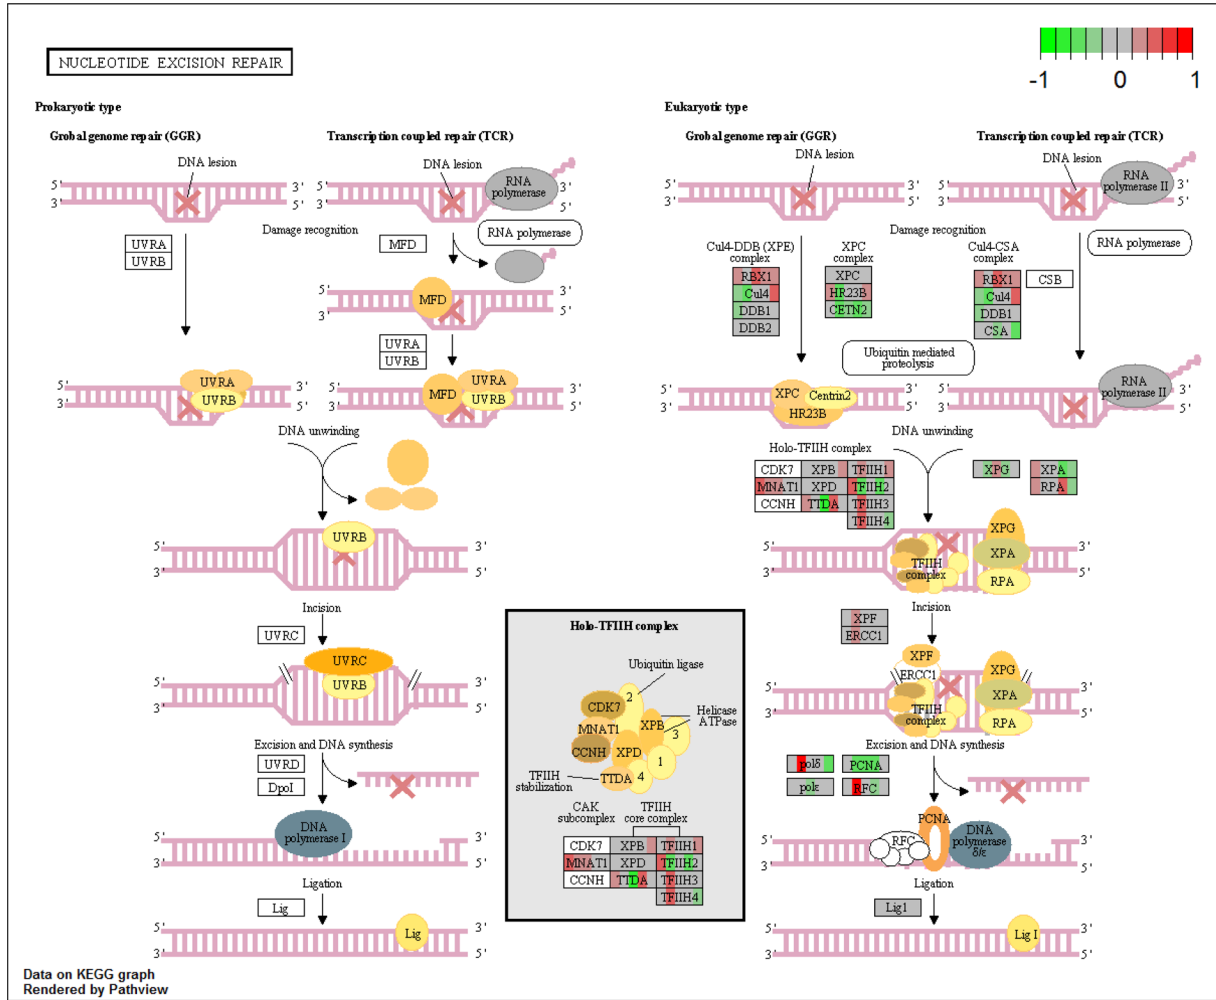

Supplementary Figure 6: KEGG/Pathway analysis - Nucleotide excision repair.







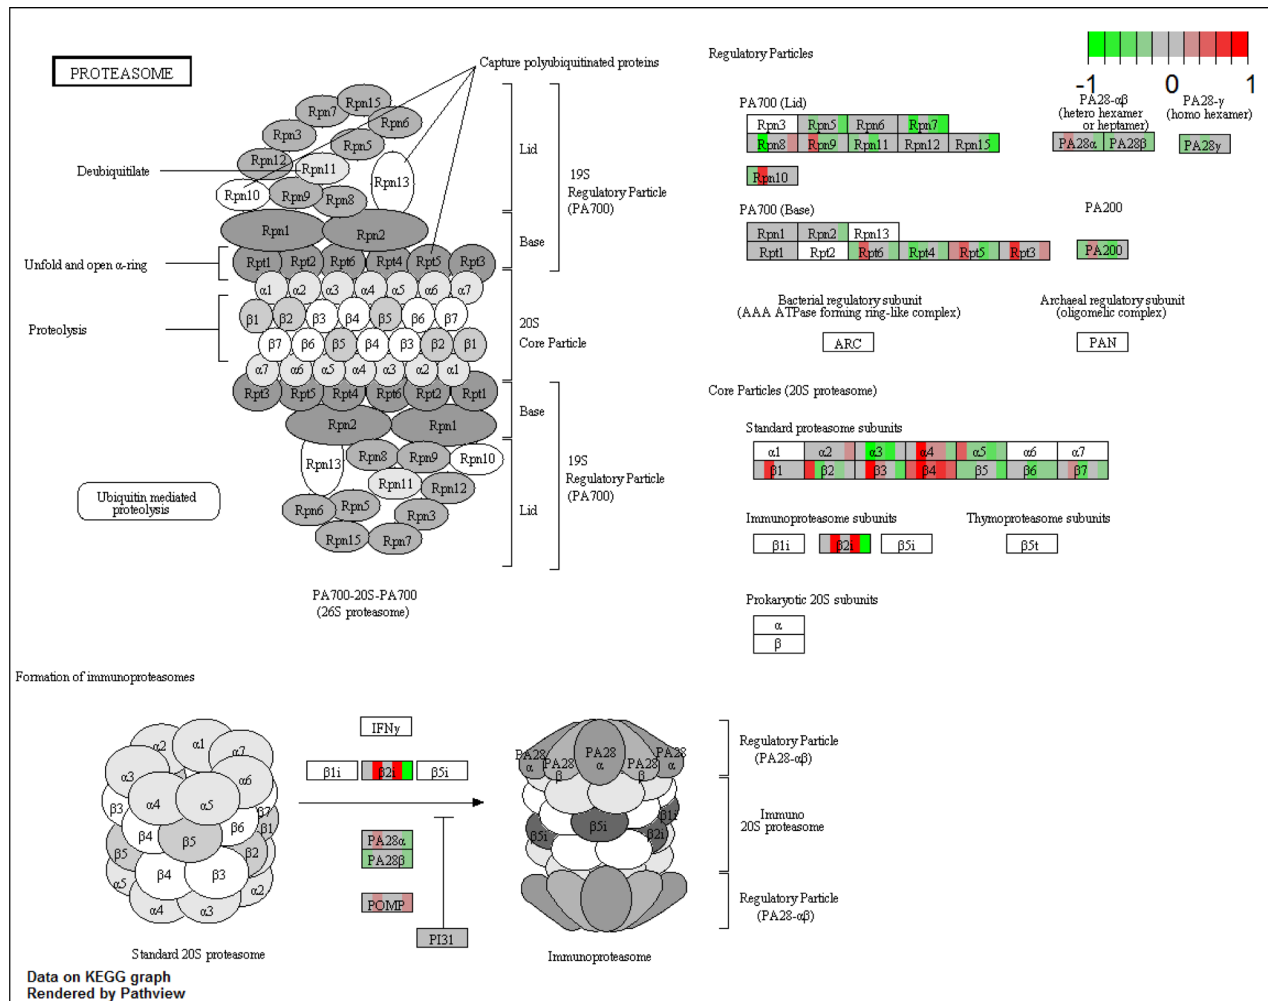

Supplementary Figure 9: KEGG/Pathway analysis - Proteasome.

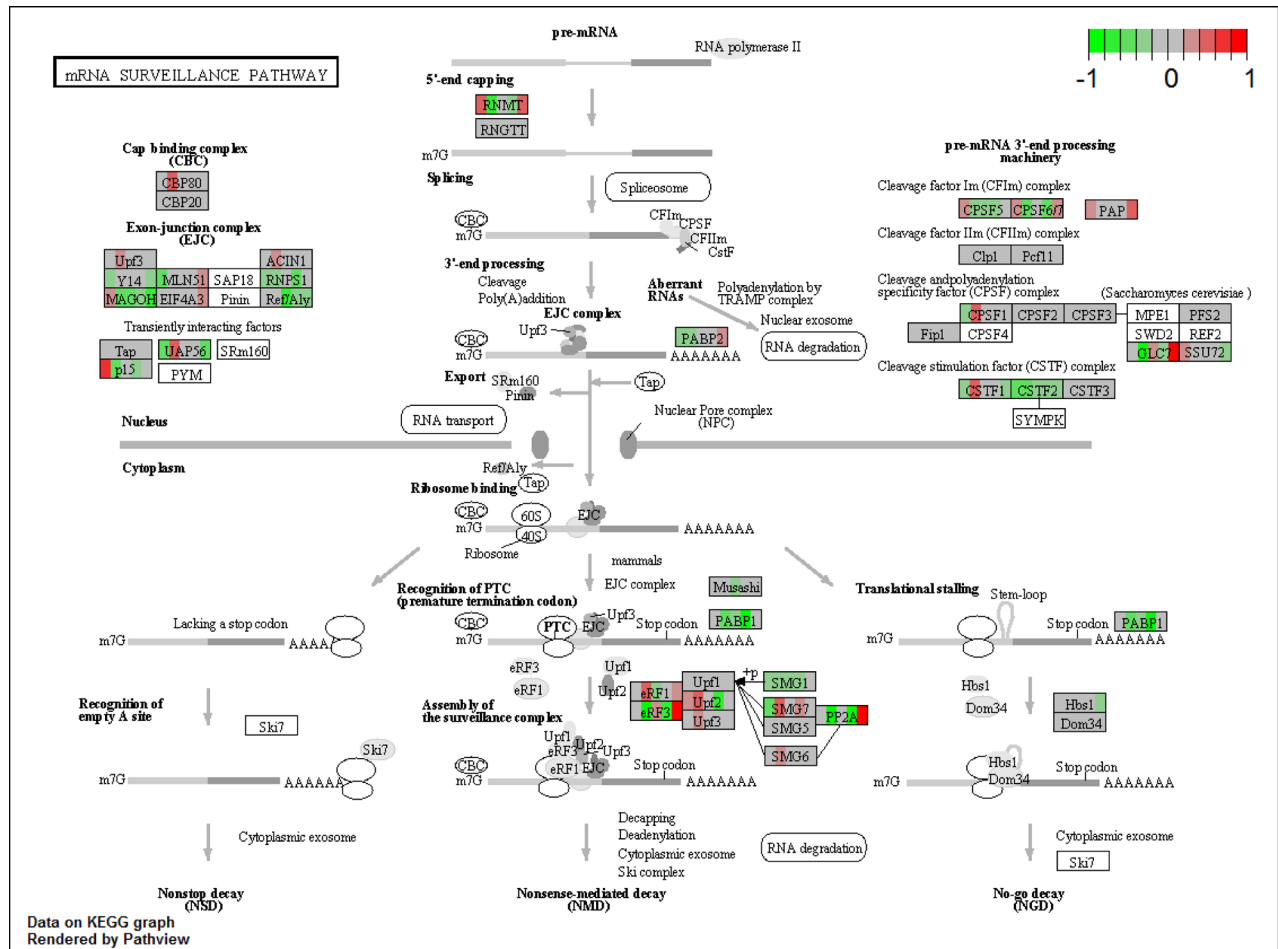

Supplementary Figure 10: KEGG/Pathway analysis - mRNA surveillance pathway.
